# Supplementary material
Source: publisher figshare collection journal article supplement (https://gsapubs.figshare.com/ndownloader/files/23318897)
Supplement: Supplementary file 1 [file 23318897]

## Sheet: Sheet1
Table DR2. Stratigraphic data for calculation of tectonic subsidence.
Strata	Age (Ma)	Thickness (m)	Elevation (m)	Lithofacies
Uppermost Shexing	96-95	>150	> 100	Conglomerate (4%),sandstone (90%), mudstone (1%)
Upper Shexing	108-96	2000	0 to 10	Sandtone (70%), mudstone (30%)
Middle Shexing	112-108	950	0 to 10	Sandstone (5%), siltstone (10%), mudstone (80%), limestone (5%)
Lower Shexing	119-112	900	0 to 50	Sandstone (70%), mudstone (30%)
Upper Tekena (Red mudstone)	120-119	50	0 to 5	Silstone (20%), mudstone (80%)
Lower Takena (Limestone)	124-120	200	0 to -10	Siltone (10%), mudstone (20%), limestone (70%)
Chumulong Fm	140-124 Ma (?)	500 (?)	0	Quartz sandstone (90%), Mudstone (10%)
